# Supplementary material
Source: Springer Nature journal article supplement (https://www.springermedizin.de/resource/supplementary/13075_2010_2873_MOESM1_ESM.pdf/9693080)

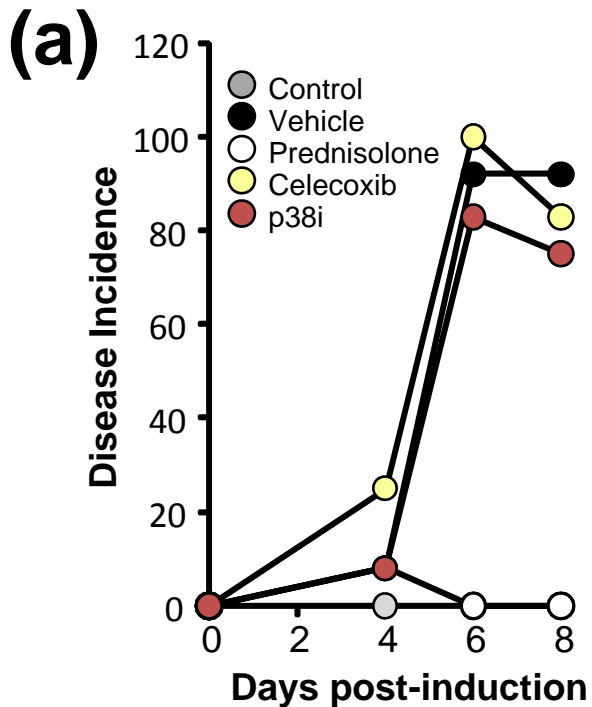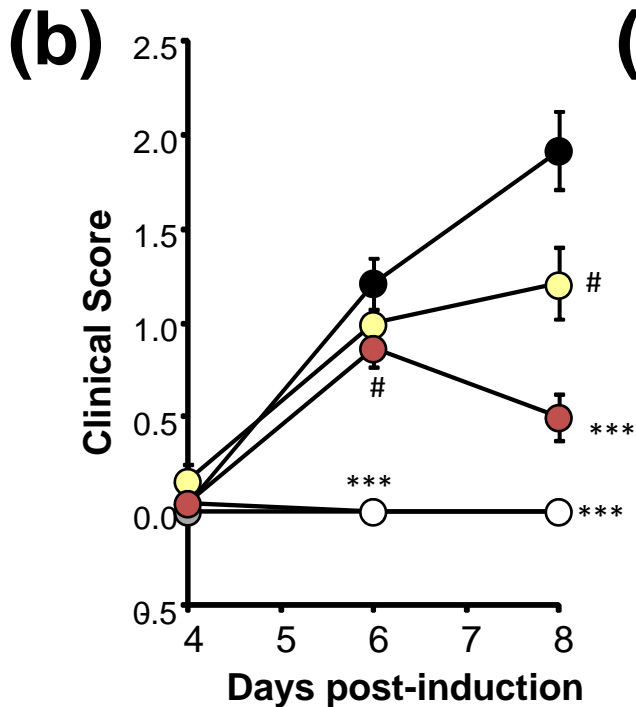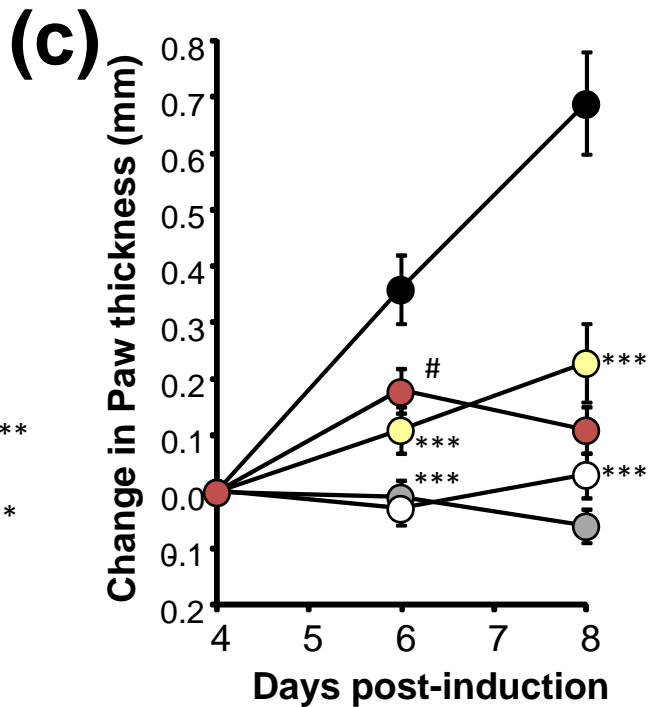

Supplement: MOESM1 [file 9693080]
